# Supplementary material for: The Dopaminergic Cells in the Median Raphe Region Regulate Social Behavior in Male Mice
Source: MDPI journal article supplement (doi:10.3390/ijms25084315), 2024-04-13
Supplement: s1 [file s1]

## Supplementary Materials

**Table S1.** List of human brain samples and their respective RNA concentrations after isolation and RNA quantity after dilution.

| Sample ID | Group   | Area                  | RNA concentration in sample<br>(ng/ $\mu$ L) | RNA quantity after dilution<br>(ng) |
|-----------|---------|-----------------------|----------------------------------------------|-------------------------------------|
| 1         | Control | pontine raphe nucleus | 206.60                                       | 1000                                |
| 2         | Control | pontine raphe nucleus | 144.50                                       | 1000                                |
| 3         | Control | pontine raphe nucleus | 590.20                                       | 1000                                |
| 4         | Control | pontine raphe nucleus | 1048.20                                      | 1000                                |
| 5         | Control | pontine raphe nucleus | 979.90                                       | 1000                                |
| 6         | Control | pontine raphe nucleus | 225.30                                       | 1000                                |
| 1         | Control | temporal cortex       | 210.99                                       | 1000                                |
| 2         | Control | temporal cortex       | 457.82                                       | 1000                                |
| 1         | Control | frontopolar cortex    | 263.02                                       | 1000                                |
| 2         | Control | frontopolar cortex    | 263.31                                       | 1000                                |
| 3         | Control | frontopolar cortex    | 318.17                                       | 1000                                |
| 4         | Control | frontopolar cortex    | 232.36                                       | 1000                                |

**Table S2.** Details of the human brain samples.

| Brain #ID | Sample ID | Area                  | Gender | Age | Post-mortem delay<br>(h) | Cause of death                  |
|-----------|-----------|-----------------------|--------|-----|--------------------------|---------------------------------|
| #186      | 1         | pontine raphe nucleus | female | 56  | 5                        | myocardial infarction           |
| #209      | 2         | pontine raphe nucleus | male   | 52  | 4.5                      | myocardial infarction           |
| #211      | 3         | pontine raphe nucleus | female | 56  | 6                        | cardiorespiratory insufficiency |
| #216      | 4         | pontine raphe nucleus | male   | 53  | 5                        | pulmonary embolism              |
| #227      | 5         | pontine raphe nucleus | male   | 55  | 6                        | acute myocardial infarction     |
| #228      | 6         | pontine raphe nucleus | male   | 27  | 8                        | pneumonia                       |
| #267      | 1         | temporal cortex       | female | 91  | 8                        | stroke                          |
| #175      | 2         | temporal cortex       | female | 49  | 6                        | suicide (drug overdose)         |
| #211      | 1         | frontopolar cortex    | female | 56  | 6                        | cardiorespiratory insufficiency |
| #267      | 2         | frontopolar cortex    | female | 91  | 8                        | stroke                          |
| #159      | 3         | frontopolar cortex    | male   | 48  | 6                        | suicide (hanging)               |
| #175      | 4         | frontopolar cortex    | female | 49  | 6                        | suicide (drug overdose)         |

**Table S3.** List of primers for PCR.

| Primer ID  |    |                                | Bases          | Product Size (bp) |
|------------|----|--------------------------------|----------------|-------------------|
| hDAT-E-1-F | 20 | GTC TGT TTG GAT TGA CGC GG     | NM_001044.5    | 205               |
| hDAT-E-1-R | 20 | ACT GTG CTT CTG TGC CAT GT     |                |                   |
| mDAT-F     | 22 | GGT GCT GAT TGC CTT CTC CAG T  | NM_010020.3    | 112               |
| mDAT-R     | 22 | GAC AAC GAA GCC AGA GGA GAA G  |                |                   |
| mDBH-F     | 22 | GAG ACT GCC TTT GTG TTG ACC G  | NM_138942.3    | 133               |
| mDBH-R     | 22 | CGA GCA CAG TAA CCA CCT TCC T  |                |                   |
| mGAPDH-F   | 23 | CAT CAC TGC CAC CCA GAA GAC TG | NM_001289726.2 | 153               |
| mGAPDH-R   | 23 | ATG CCA GTG AGC TTC CCG TTC AG |                |                   |
| mTH-F      | 23 | TGC ACA CAG TAC ATC CGT CAT GC | NM_009377.2    | 107               |
| mTH-R      | 22 | GCA AAT GTG CGG TCA GCC AAC A  |                |                   |

A: adenine; C: cytosine; E: exon-exon junction; F: forward primer; G: guanine hDAT: human dopamine transporter; mDAT: mouse dopamine transporter; mDBH: mouse dopamine  $\beta$ -hydroxylase; mGAPDH: glyceraldehyde 3-phosphate dehydrogenase; mTH: mouse tyrosine hydroxylase; R: reversed primer; T: thymine.
